# Supplementary material for: Affordability of Medication Therapy in Diabetic Patients: A Scenario-Based Assessment in Iran’s Health System Context
Source: PubMed Central journal article supplement (PMC9309945; doi:10.34172/ijhpm.2020.152), 2020-08-22
Supplement: ijhpm-11-443-s002.pdf [file ijhpm-11-443-s002.pdf]

**Supplementary file 2.** Scenario-based affordability assessment for type 2 diabetes

| Therapy Phase       | NO | Generic Name          | Dose      | Dosage Form | Insurance coverages (%) | Dose of Administration/day                | Treatment response | Affordability ratio |          |
|---------------------|----|-----------------------|-----------|-------------|-------------------------|-------------------------------------------|--------------------|---------------------|----------|
| <b>Mono Therapy</b> | 1  | Metformin             | 500 mg    | TABLET      | 70                      | 500mg/day                                 | Yes                | 0.02                |          |
|                     |    |                       |           |             |                         | The dose is increased by 50% every 7 days | No                 | 0.06                |          |
|                     | 2  | Glibenclamide         | 5 mg      | TABLET      | 70                      | 2.5mg/day                                 | Yes                | 0.004               |          |
|                     |    |                       |           |             |                         | The dose is increased by 50% every 7 days | No                 | 0.01                |          |
|                     | 3  | Gliclazide            | 80 mg     | TABLET      | 70                      | 40mg/day                                  | Yes                | 0.01                |          |
|                     |    |                       |           |             |                         | The dose is increased by 50% every 7 days | No                 | 0.03                |          |
| <b>Dual Therapy</b> | 1  | Metformin+Acarbose    | Metformin | 500 mg      | TABLET                  | 70                                        | 1500mg/day         | Yes                 | 0.09     |
|                     |    |                       | Acarbose  | 50 mg       | TABLET                  | 70                                        | 25mg/day           |                     |          |
|                     |    |                       | Metformin | 500 mg      | TABLET                  | 70                                        | 1500mg/day         | No                  | 0.1      |
|                     |    |                       | Acarbose  | 50 mg       | TABLET                  | 70                                        | 50mg/day           |                     |          |
|                     | 2  | Metformin+Repaglinide | Metformin | 500 mg      | TABLET                  | 70                                        | 1500mg/day         | Yes                 | 0.38 and |

|   |                         |  |               |        |        |    |                                          |     |      |
|---|-------------------------|--|---------------|--------|--------|----|------------------------------------------|-----|------|
|   |                         |  | Repaglinide   | 1 mg   | TABLET | 70 | base on HgA1C<br><8% 0.5 tid<br>>8% 1tid |     | 0.22 |
|   |                         |  | Metformin     | 500 mg | TABLET | 70 | 1500mg/day                               | No  | 0.80 |
|   |                         |  | Repaglinide   | 1 mg   | TABLET | 70 | 16 mg/day                                |     |      |
| 3 | Metformin+Glibenclamide |  | Metformin     | 500 mg | TABLET | 70 | 1500mg/day                               | Yes | 0.07 |
|   |                         |  | Glibenclamide | 5 mg   | TABLET | 70 | 2.5mg/day                                |     |      |
|   |                         |  | Metformin     | 500 mg | TABLET | 70 | 1500mg/day                               | No  | 0.07 |
|   |                         |  | Glibenclamide | 5 mg   | TABLET | 70 | 12.5mg/day                               |     |      |
| 4 | Metformin+Gliclazide    |  | Metformin     | 500 mg | TABLET | 70 | 1500mg/day                               | Yes | 0.08 |
|   |                         |  | Gliclazide    | 80 mg  | TABLET | 70 | 40mg/day                                 |     |      |
|   |                         |  | Metformin     | 500 mg | TABLET | 70 | 1500mg/day                               | No  | 0.10 |
|   |                         |  | Gliclazide    | 80 mg  | TABLET | 70 | 200mg/day                                |     |      |
| 5 | Metformin+Pioglitazone  |  | Metformin     | 500 mg | TABLET | 70 | 1500mg/day                               | Yes | 0.11 |
|   |                         |  | Pioglitazone  | 30 mg  | TABLET | 70 | 15mg/day                                 |     |      |
|   |                         |  | Metformin     | 500 mg | TABLET | 70 | 1500mg/day                               | No  | 0.19 |
|   |                         |  | Pioglitazone  | 30 mg  | TABLET | 70 | 75mg/day                                 |     |      |

|                       |   |                                       |               |        |        |            |            |     |      |
|-----------------------|---|---------------------------------------|---------------|--------|--------|------------|------------|-----|------|
| <b>Triple therapy</b> | 1 | Metformin+ Pioglitazone+ Glibenclamde | Metformin     | 500 mg | TABLET | 70         | 1500mg/day | Yes | 0.12 |
|                       |   |                                       | Pioglitazone  | 30 mg  | TABLET | 70         | 15mg/day   |     |      |
|                       |   |                                       | Glibenclamide | 5 mg   | TABLET | 70         | 2.5mg/day  |     |      |
|                       |   |                                       | Metformin     | 500 mg | TABLET | 70         | 1500mg/day | No  |      |
|                       |   |                                       | Pioglitazone  | 30 mg  | TABLET | 70         | 75mg/day   |     |      |
|                       |   |                                       | Glibenclamide | 5 mg   | TABLET | 70         | 12.5mg/day |     |      |
|                       | 2 | Metformin+ Pioglitazone+ Gliclazide   | Metformin     | 500 mg | TABLET | 70         | 1500mg/day | Yes | 0.13 |
|                       |   |                                       | Pioglitazone  | 30 mg  | TABLET | 70         | 15mg/day   |     |      |
|                       |   |                                       | Gliclazide    | 80 mg  | TABLET | 70         | 40mg/day   |     |      |
|                       |   |                                       | Metformin     | 500 mg | TABLET | 70         | 1500mg/day | No  |      |
|                       |   |                                       | Pioglitazone  | 30 mg  | TABLET | 70         | 75mg/day   |     |      |
|                       |   |                                       | Gliclazide    | 80 mg  | TABLET | 70         | 200mg/day  |     |      |
|                       | 3 | Metformin+ Pioglitazone+ Acarbose     | Metformin     | 500 mg | TABLET | 70         | 1500mg/day | Yes | 0.14 |
|                       |   |                                       | Pioglitazone  | 30 mg  | TABLET | 70         | 15mg/day   |     |      |
|                       |   |                                       | Acarbose      | 50 mg  | TABLET | 70         | 25mg/day   |     |      |
| Metformin             |   |                                       | 500 mg        | TABLET | 70     | 1500mg/day | NO         |     |      |
| Pioglitazone          |   |                                       | 30 mg         | TABLET | 70     | 75mg/day   |            |     |      |
|                       |   |                                       |               |        |        |            |            |     |      |

|                        |   |                                       |                             |                |                  |                  |              |              |          |      |
|------------------------|---|---------------------------------------|-----------------------------|----------------|------------------|------------------|--------------|--------------|----------|------|
|                        |   |                                       | Acarbose                    | 50 mg          | TABLET           | 70               | 50mg/day     |              |          |      |
|                        | 4 | Metformin+ basal Insulin**            | Metformin+ Insulin isophane | 500 mg         | Metformin        | 70               | 1500mg/day   | Yes          | 0.24     |      |
|                        |   |                                       |                             | 100 IU/ml      | Insulin isophane | 90               | 0.4IU/kg/day |              |          |      |
|                        |   |                                       | Metformin+ Insulin glargine | 500 mg         | Metformin        | 70               | 1500mg/day   | Yes          | 0.78     |      |
|                        |   |                                       |                             | 100 IU/ml      | Insulin glargine | 90               | 0.4IU/kg/day |              |          |      |
|                        |   |                                       | Metformin+Insulin detemir   | 500 mg         | Metformin        | 70               | 1500mg/day   | Yes          | 2.65     |      |
|                        |   |                                       |                             | 100 IU/ml      | Insulin detemir  | 70               | 0.4IU/kg/day |              |          |      |
| <b>Insulin Therapy</b> | 5 | 50% Basal+ 50% Rapid or Short -Acting | NPH+Regular                 | 100 IU/ml      | Insulin isophane | 90               | 0.5IU/kg/day | Lifetime     | 0.34     |      |
|                        |   |                                       |                             | 100 IU/ml      | Regular          | 95               | 0.5IU/kg/day |              |          |      |
|                        |   |                                       | NPH+ Aspart                 | 100 IU/ml      | Insulin isophane | 90               | 0.5IU/kg/day | Lifetime     | 0.53     |      |
|                        |   |                                       |                             | 100 IU/ml      | Aspart           | 95               | 0.5IU/kg/day |              |          |      |
|                        |   |                                       |                             | NPH+ Glulisine | 100 IU/ml        | Insulin isophane | 90           | 0.5IU/kg/day | Lifetime | 1.89 |

|  |  |                     |           |           |    |              |          |      |
|--|--|---------------------|-----------|-----------|----|--------------|----------|------|
|  |  |                     | 100 IU/ml | Glulisine | 70 | 0.5IU/kg/day |          |      |
|  |  | Glargine+ Regular   | 100 IU/ml | Glargine  | 90 | 0.5IU/kg/day | Lifetime | 0.88 |
|  |  |                     | 100 IU/ml | Regular   | 95 | 0.5IU/kg/day |          |      |
|  |  | Glargine+ Aspart    | 100 IU/ml | Glargine  | 90 | 0.5IU/kg/day | Lifetime | 1.07 |
|  |  |                     | 100 IU/ml | Aspart    | 95 | 0.5IU/kg/day |          |      |
|  |  | Glargine+ Glulisine | 100 IU/ml | Glargine  | 90 | 0.5IU/kg/day | Lifetime | 2.43 |
|  |  |                     | 100 IU/ml | Glulisine | 70 | 0.5IU/kg/day |          |      |

Note: all calculation were performed for patient of 75 kg.

\*\* If not responded, shift to insulin therapy. See this part.
